# Supplementary material for: Autonomic modulation and antiarrhythmic therapy in a model of long QT syndrome type 3
Source: PubMed Central journal article supplement — Cardiovasc Res. 2010 Jan 28;87(1):60–72. doi: 10.1093/cvr/cvq029 (PMC2883895; doi:10.1093/cvr/cvq029), 2010-01-28
Supplement: supp_cvq029_cvq029supp.pdf [file supp_cvq029_cvq029supp.pdf]

## 1. Supplemental Methods

### 1.1 Genotyping

Genomic DNA was purified by phenol/chloroform extraction, precipitated by the addition of 1/10 volume of 3M NaAc pH 6, washed and dissolved in 50 µl sterile distilled water.

As described in (Nuyens et al; Nat Med. 2001 Sep;7(9):1021-7), the mutated *SCN5A* allele differs from the WT by a deletion of 9 bp (encoding KPQ) and by the introduction of a silent *EcoRV* site upstream from the  $\Delta$ KPQ deletion, in the exon 26. Similar to as described in the thesis of Dieter Nuyens, 460 ng genomic DNA were amplified with the primers scn5a8 (5'gcagtgggagacaacctctacatg 3') and scn5a11 (5'cagctgttggtgaagtaatagtg 3') using Illustra PuReTaq Ready-To-Go PCR kit (GE healthcare #27-9557-01). The 2.3 kb PCR products were digested with the restriction enzyme *EcoRV* (NEB) at 37°C for at least 2h. *EcoRV* digestion results in an uncutted 2.3 kb fragment for the WT allele, and a 1.7 kb plus a 626 bp fragments for the mutated *SCN5A*  $\Delta$ KPQ allele. The fragments were separated and visualized on 2% agarose gels.

Supplemental Figure 1: Scheme of  $\Delta$ KPQ deletion and genotyping

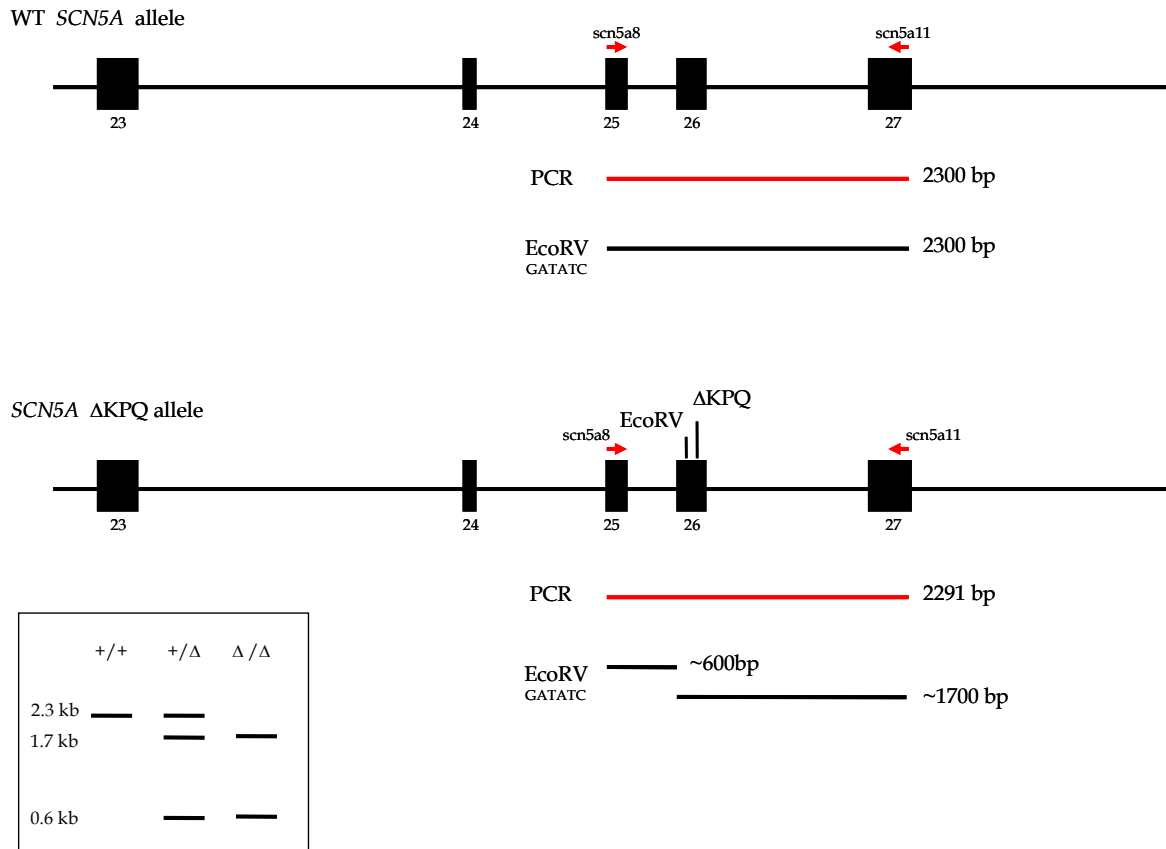

## **1. Supplemental Methods cont.**

### **1. 2 Telemetry**

After surgery, animals were allowed to regain weight and were undisturbed except for weighing. After animals had regained weight after 10-14d, stress tests were limited to one test per day. In order to save in vivo animals, identical drug protocols were repeated a maximum of three times per animal with a rest period of more than 24 h in between challenges.

Analysis of PQ and QT duration could not be performed on all telemetry ECG traces as the tracings had to be completely free of noise and artefacts for these detailed measurements that require identification of the onset of the P wave and the end of the T wave. RR intervals could be readily measured in all recordings.

For flecainide therapy, the drinking water was sweetened to make up for the slightly bitter taste of flecainide. Chronic therapy with 45 mg/kg BW flecainide resulted in drug plasma levels within human therapeutic range ( $509 \pm 110$  ng/ml) as indicated in the manuscript. We performed drug dosing studies to achieve these therapeutic plasma levels. Lower doses of flecainide (15 or 30 mg/kg/d') did not regularly result in therapeutic plasma levels

### **1.3 Sodium current in isolated cardiomyocytes**

Differences in results from peak current measurements compared to Nuyens et al. most probably result from different holding potentials, sets of bath and pipette solutions and frequency of test pulses (in our study 0.2 Hz, not 10 Hz as in Nuyens et al.). The results are in accordance with data published by Fredj et al (References 12 and 32 in main paper).

## **Supplemental results**

**Supplemental Figure 2:** Effect of muscarinic receptor blockade by AFDX116 prior to carbachol application on carbachol-induced bradycardia (above) and arrhythmias (below) in  $\Delta$ KPQ-SCN5A mice. Different doses of AFDX116 were applied 15 min before application of a carbachol 0.5mg/kg BW in n=3 mice. Mice were allowed to rest for at least 72h in between applications.

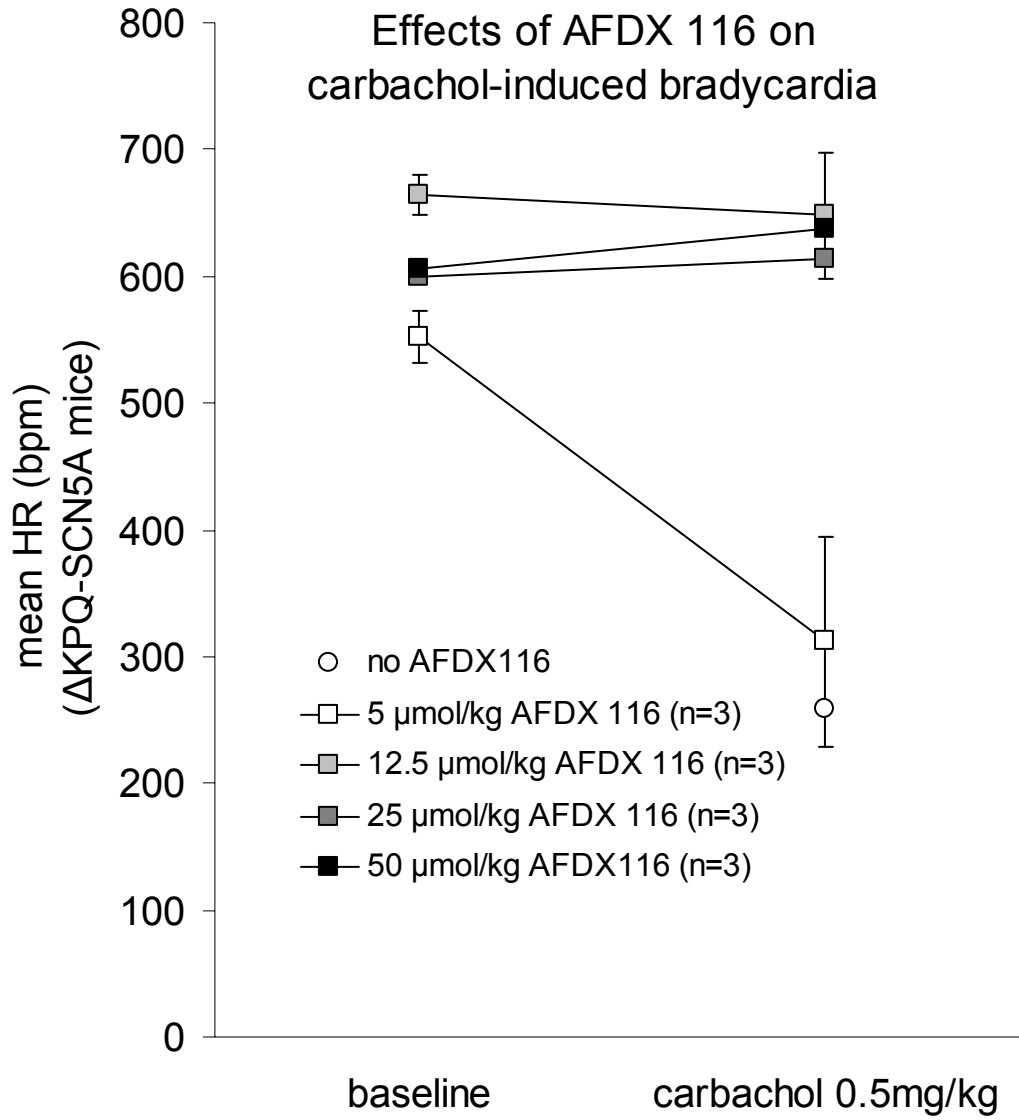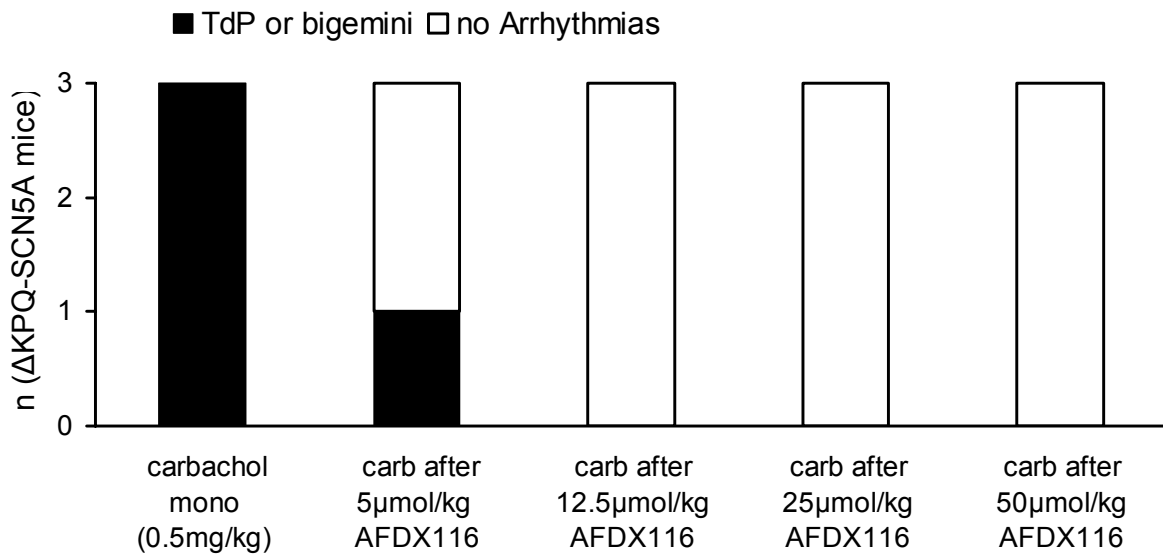

### Supplemental Figure 3

Example of bradycardia in a LQT3 patient. Home-based ECG monitor recording of an infant with long QT syndrome 3 on propranolol treatment. Transient functional 2:1 functional AV-block causes marked bradycardia in this night-time recording. Asterisks (\*) mark P waves, numbers give heart rates. The infant died suddenly 2 hours later due to torsade de pointes (see Figure 2 in<sup>4</sup>). QT and QTc interval are markedly prolonged during bradycardia. Post-mortem genetic testing identified a missense mutation (Ala1330Pro) in the cardiac sodium channel gene SCN5A.

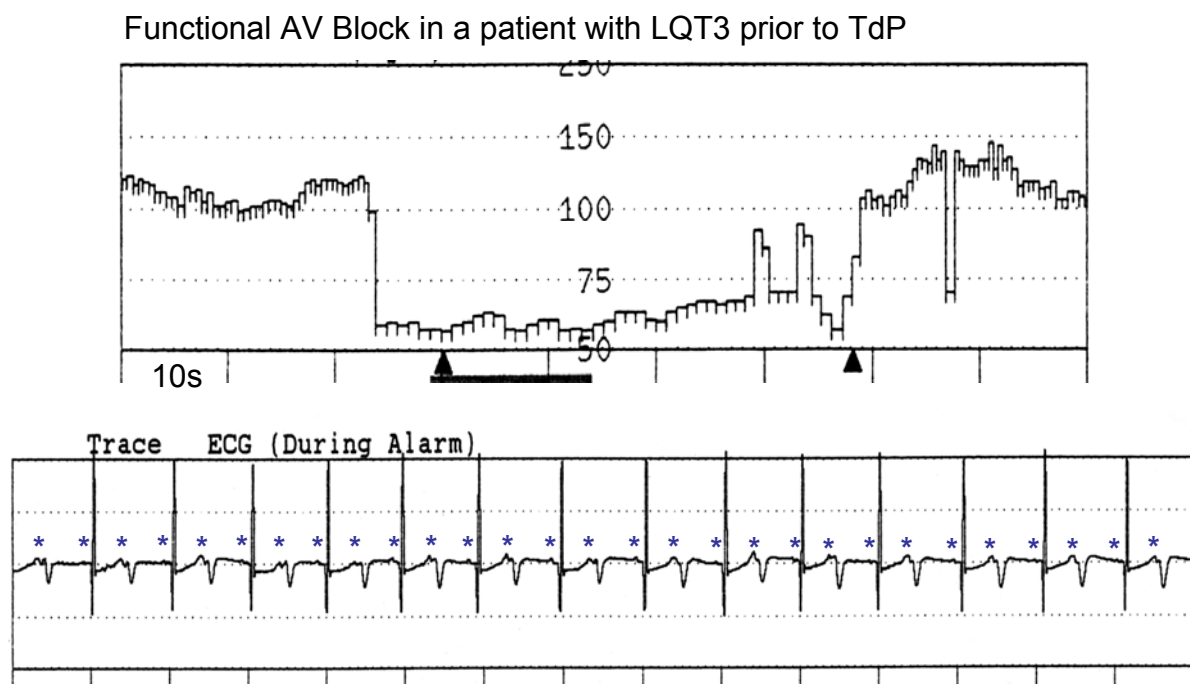

**Supplemental Table 1**

The table indicates APD 90 and 70 in both genotypes at baseline and during application of carbachol during rapid fixfrequent pacing \*  $p < 0.05$  vs. WT, #  $p < 0.05$  vs. baseline. In contrast to spontaneous APD, no prolongation of APD by carbachol is seen during rapid fixfrequent pacing. (n of MAPs analyzed in brackets).

|               |                    | 100ms CL                | 120ms CL            | 140ms CL            | 150ms CL           | 200ms CL            |                     |
|---------------|--------------------|-------------------------|---------------------|---------------------|--------------------|---------------------|---------------------|
| <b>APD 90</b> | $\Delta$ KPQ SCN5A | baseline                | 42 ms $\pm$ 3 (14)  | 46 ms $\pm$ 3 (15)  | 49 ms $\pm$ 4 (14) | 49 ms $\pm$ 4 (15)  | 53 ms $\pm$ 5 (14)  |
|               |                    | Carbachol 0.1 $\mu$ mol | 37 ms $\pm$ 4 (12)  | 37 ms $\pm$ 3# (14) | 40 ms $\pm$ 5 (10) | 40 ms $\pm$ 4* (11) | 41 ms $\pm$ 3 (11)  |
|               |                    | Carbachol 1 $\mu$ mol   | 45 ms $\pm$ 2 (14)  | 42 ms $\pm$ 3 (15)  | 45 ms $\pm$ 3 (14) | 42 ms $\pm$ 3 (17)  | 46 ms $\pm$ 4 (12)  |
|               | WT                 | baseline                | 40 ms $\pm$ 2 (13)  | 40 ms $\pm$ 2 (13)  | 41 ms $\pm$ 2 (11) | 42 ms $\pm$ 2 (11)  | 47 ms $\pm$ 3 (8)   |
|               |                    | Carbachol 0.1 $\mu$ mol | 33 ms $\pm$ 2# (12) | 31 ms $\pm$ 3# (13) | 32 ms $\pm$ 2# (9) | 28 ms $\pm$ 2# (9)  | 33 ms $\pm$ 3# (10) |
|               |                    | Carbachol 1 $\mu$ mol   | 42 ms $\pm$ 3 (12)  | 42 ms $\pm$ 3 (12)  | 44 ms $\pm$ 4 (7)  | 44 ms $\pm$ 4 (7)   | 46 ms $\pm$ 3 (9)   |
| <b>APD70</b>  | $\Delta$ KPQ SCN5A | baseline                | 24 ms $\pm$ 2 (14)  | 26 ms $\pm$ 3 (15)  | 28 ms $\pm$ 3 (14) | 28 ms $\pm$ 3 (15)  | 28 ms $\pm$ 4 (14)  |
|               |                    | Carbachol 0.1 $\mu$ mol | 21 ms $\pm$ 3 (12)  | 20 ms $\pm$ 2 (14)  | 21 ms $\pm$ 3 (10) | 20 ms $\pm$ 2* (11) | 22 ms $\pm$ 3* (11) |
|               |                    | Carbachol 1 $\mu$ mol   | 24 ms $\pm$ 2 (14)  | 21 ms $\pm$ 2 (15)  | 22 ms $\pm$ 2 (14) | 20 ms $\pm$ 2 (17)  | 24 ms $\pm$ 3 (13)  |
|               | WT                 | baseline                | 23 ms $\pm$ 2 (13)  | 23 ms $\pm$ 2 (13)  | 22 ms $\pm$ 2 (11) | 22 ms $\pm$ 2 (11)  | 27 ms $\pm$ 2 (8)   |
|               |                    | Carbachol 0.1 $\mu$ mol | 17 ms $\pm$ 1# (12) | 15 ms $\pm$ 2# (13) | 16 ms $\pm$ 1# (9) | 14 ms $\pm$ 0# (9)  | 15 ms $\pm$ 2# (11) |
|               |                    | Carbachol 1 $\mu$ mol   | 23 ms $\pm$ 3 (12)  | 20 ms $\pm$ 2 (12)  | 19 ms $\pm$ 3 (7)  | 20 ms $\pm$ 3 (7)   | 20 ms $\pm$ 2 (9)   |
